# Supplementary material for: Ready-to-use graphene-related material-added multi-grade oils: characterization and performance in car engine working conditions
Source: Royal Society of Chemistry journal article supplement (doi:10.1039/d4ra02406k), 2024-01-01
Supplement: d4ra02406k1.pdf [file d4ra02406k1.pdf]

*Electronic Supporting Information*

**Ready-to-use Graphene Related Materials added multi-grade oils: Characterization and performance in car engine working conditions**

Miquel Garcia Lleo, Valentina Sacchetti, Claudio Cacciola, Elena Medri, Simone Ligi, Andrea Liscio, Matteo Minelli

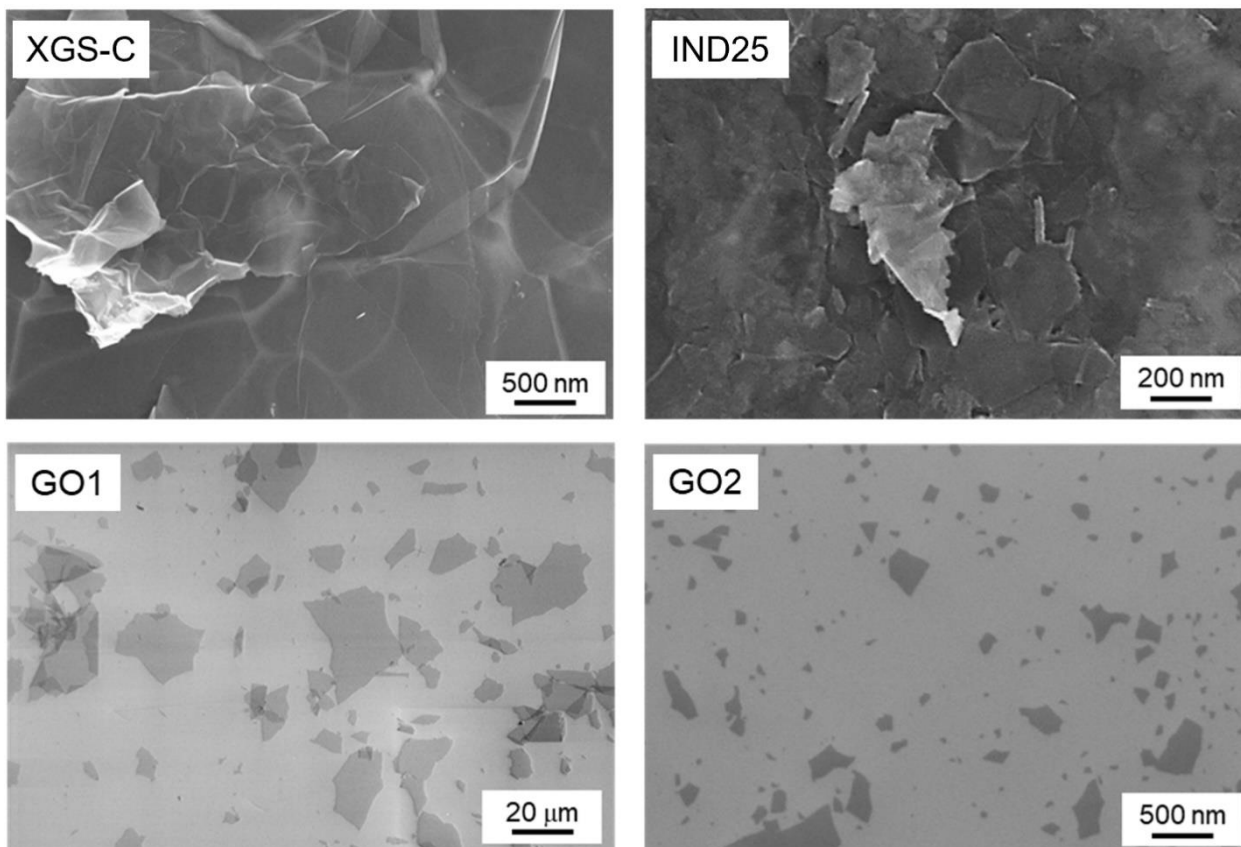

**Figure S1.** SEM images of GRM samples deposited on silicon wafers.

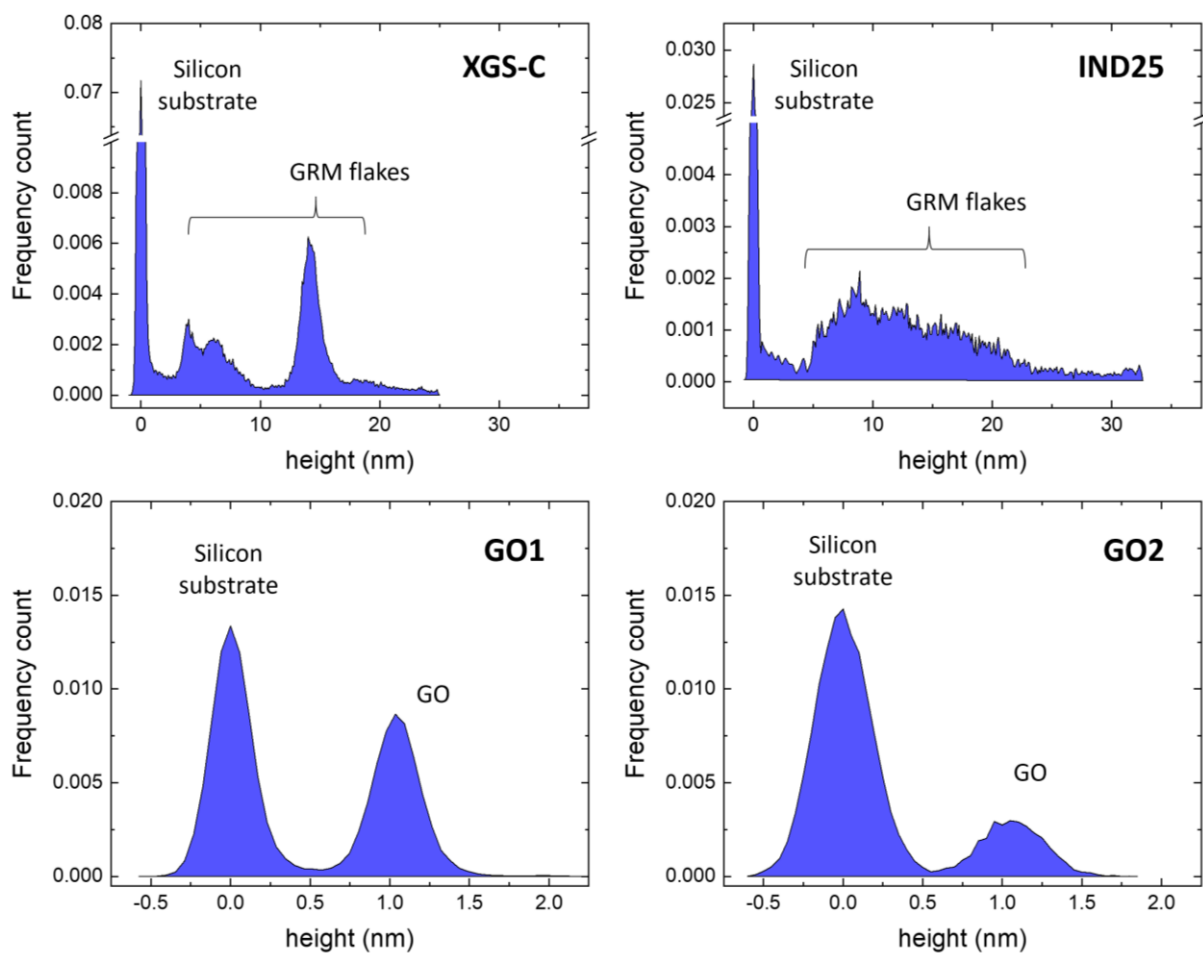

**Figure S2.** Height histogram distribution of the corresponding AFM images reported in the figure 1 of the main text.

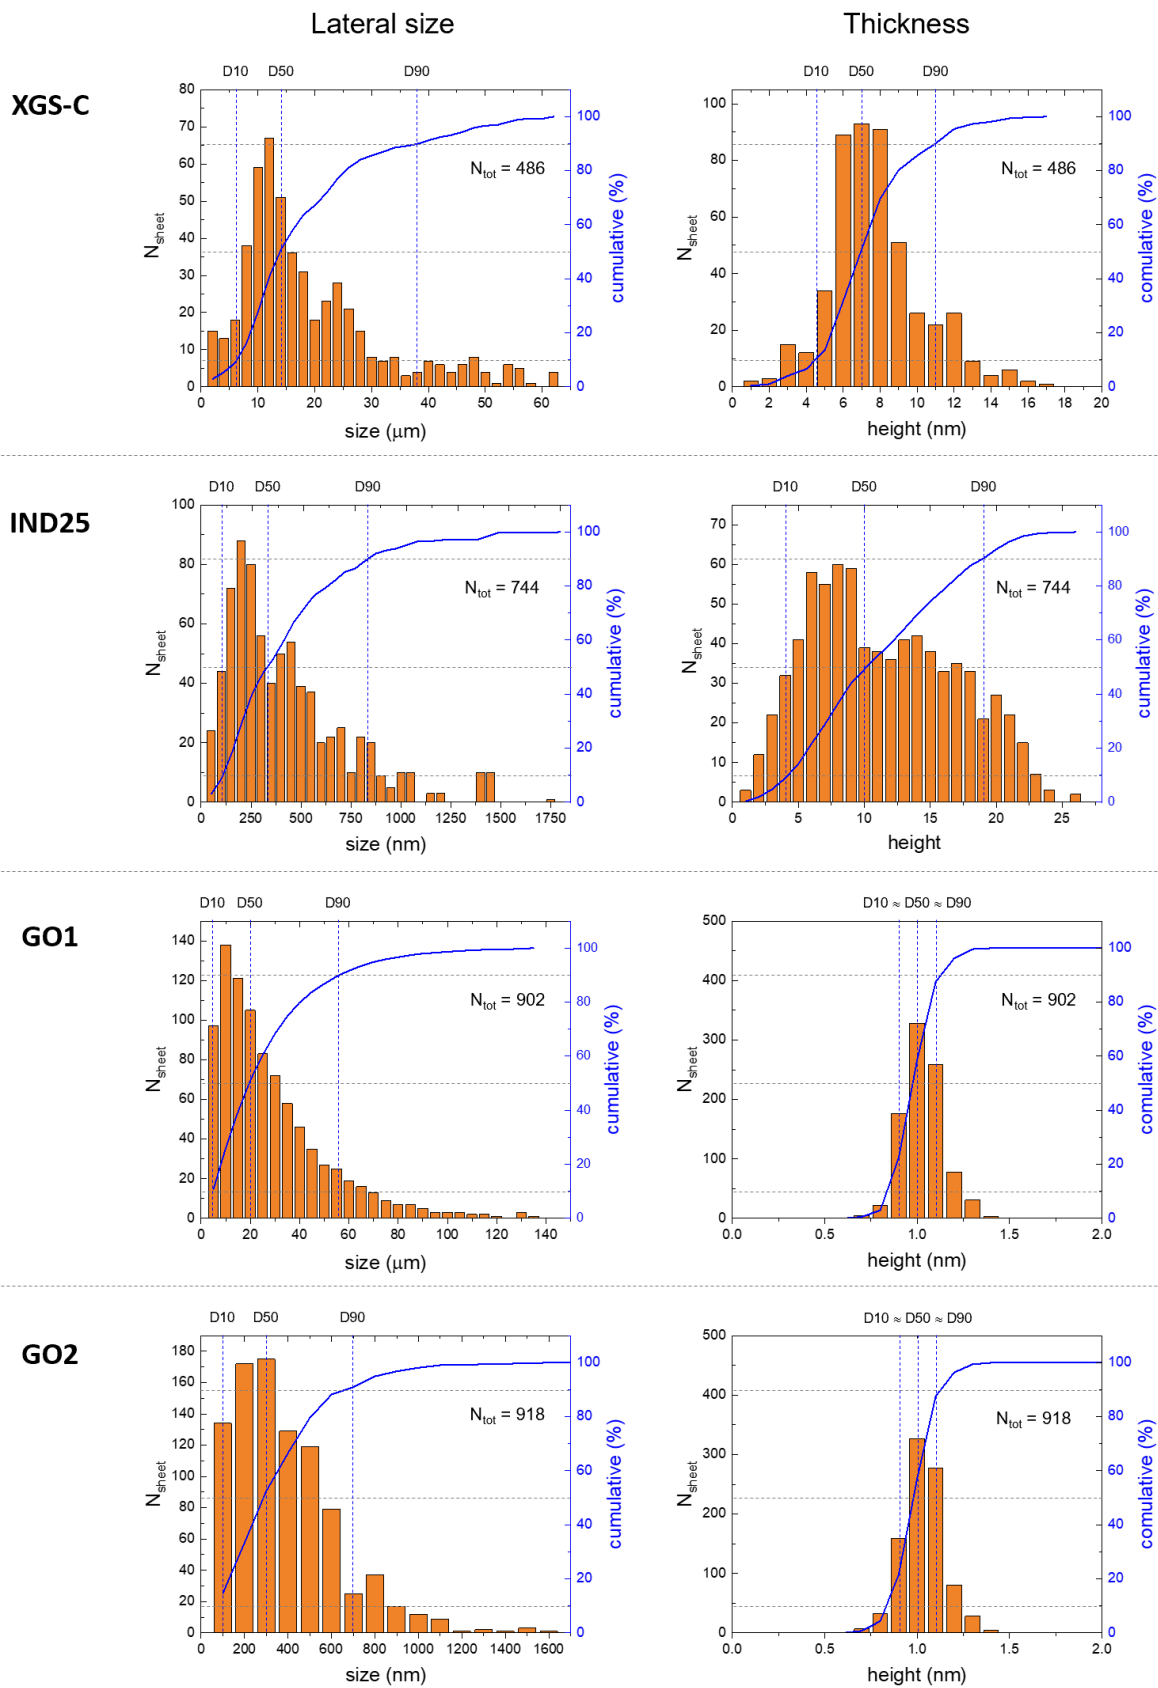

**Figure S3.** Lateral size and height distributions of the four GRMs (orange bar), corresponding cumulative curves (blue lines) and percentiles.

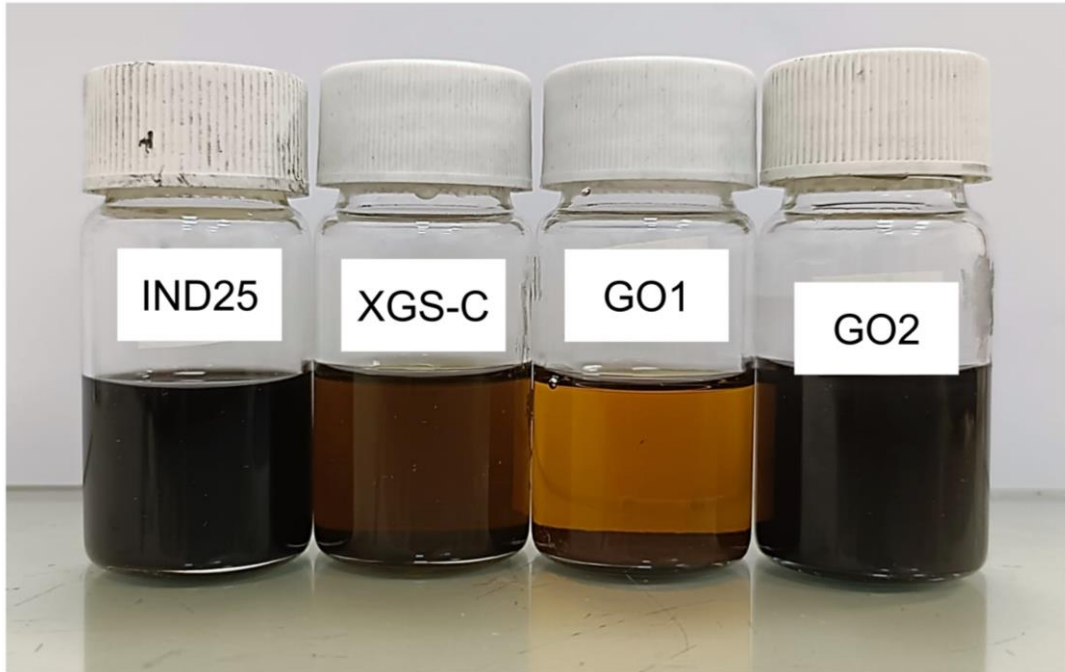

**Figure S4.** Picture of the 5W-40 oil:dispersant:GRM blend suspension after 9 months of preservation.

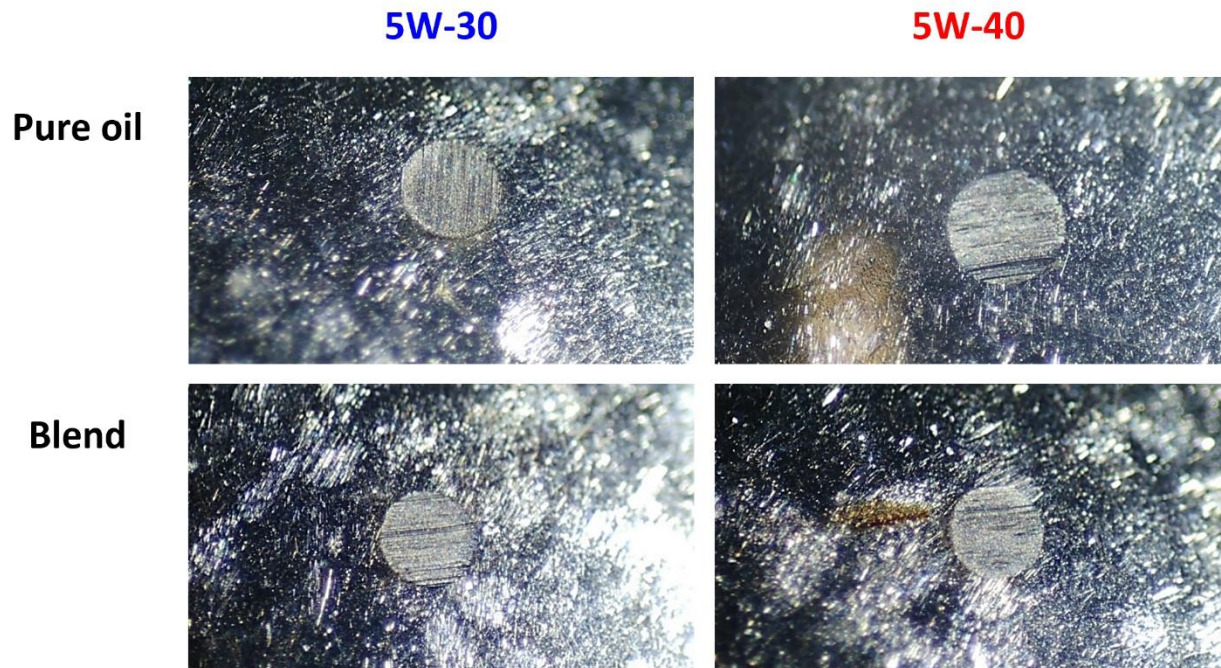

**Figure S5.** Optical images of wear diameter scar after four ball tests.

**Table S1.** Measured wear diameter scar

|          | 5W-30     | 5W-40     |
|----------|-----------|-----------|
| Pure oil | 470±20 μm | 500±10 μm |
| Blend    | 440±20 μm | 460±10 μm |

**Table S2.** Experimental conditions of 4-ball test setup in comparison with ASTM D2266 method

|                       | <b>ASTM D2266</b> | <b>4 BALL setupP</b> |
|-----------------------|-------------------|----------------------|
| <b>Ball diameter</b>  | 12.7 mm           | 14 mm                |
| <b>Steel</b>          | AISI E-52100      | AISI E-52100         |
| <b>Temperature</b>    | 75 °C             | 65-85                |
| <b>Rotation speed</b> | 1200±60 rpm       | 1850±10 rpm          |
| <b>Load</b>           | 147 N or 392 N    | 345 N                |
| <b>Time</b>           | 60 minutes        | 40 minutes           |

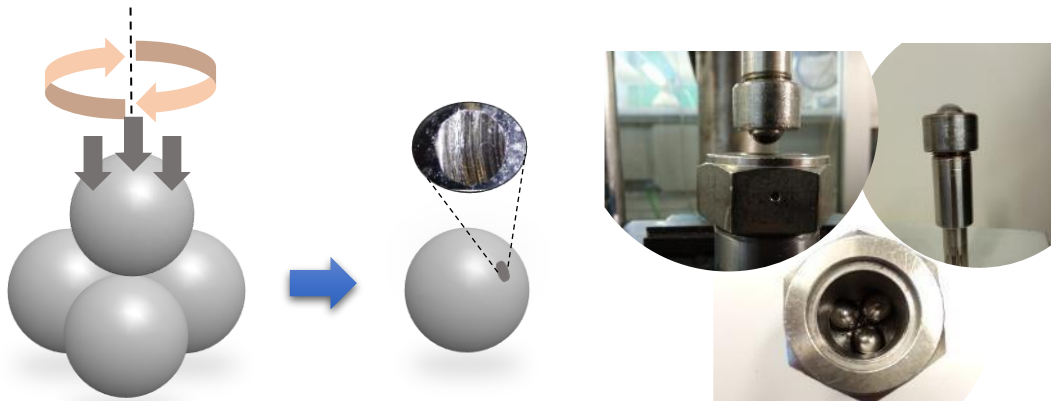

**Figure S6.** Scheme and pictures of the four ball test setup.
